# Supplementary material for: CO2 hydrogenation to formic acid on Pd–Cu nanoclusters: a DFT study
Source: Royal Society of Chemistry journal article supplement (doi:10.1039/d2cp03805f), 2023-01-01
Supplement: d2cp03805f2.pdf [file d2cp03805f2.pdf]

### Supplementary Table Captions

**ST1:** Binding energy ( $E_b$ ) and related bond lengths of  $H_2$ , H, 2H,  $CO_2$ , HOCO, HCOO and HCOOH on  $Pd_4Cu_4$  cluster.

**ST2:** Binding energy ( $E_b$ ) and related bond lengths of  $H_2$ , H, 2H,  $CO_2$ , HOCO, HCOO and HCOOH on  $Pd_{12}Cu$  cluster.

**ST3:** Geometric isomers of  $Pd_4$ ,  $Pd_mCu_n$  ( $m+n = 4$ ) and  $Cu_4$  clusters (Atomic colours: Green = Pd, Brown= Cu)

**ST4:** Geometric isomers of  $Pd_8$ ,  $Pd_mCu_n$  ( $m+n = 8$ ) and  $Cu_8$  clusters (Atomic colours: Green = Pd, Brown= Cu)

**ST5:** Geometric isomers of  $CuPd_{12}$  cluster (Atomic colours: Green = Pd, Brown= Cu)

**ST6:** Total Charge distribution ( $e/\text{Å}^3$ ) on atoms of  $Pd_2Cu_2$  and  $CO_2$  adsorbed  $Pd_2Cu_2$  cluster ( $Pd_2Cu_2-CO_2$ ).

**ST7:** Total Charge distribution ( $e/\text{Å}^3$ ) on atoms of  $Pd_4Cu_4$  and  $CO_2$  adsorbed  $Pd_4Cu_4$  cluster ( $Pd_4Cu_4-CO_2$ ).

**ST8:** Total Charge distribution ( $e/\text{Å}^3$ ) on atoms of  $Pd_{12}Cu$  and  $CO_2$  adsorbed  $Pd_{12}Cu$  cluster ( $Pd_{12}Cu-CO_2$ ).

**ST9:** Lowest energy  $Pd_4$ ,  $Cu_4$ ,  $Pd_8$ ,  $Cu_8$  and  $Pd_mCu_n$  ( $m+n=4, 8$  and  $13$ ) clusters along with their position coordinates (in cartesian). (Atomic colours: Green: Pd, Brown: Cu)

## Supplementary Figure Captions

**SF1:** Lowest energy structure of Pd<sub>4</sub>Cu<sub>4</sub> clusters along with their (a) H<sub>2</sub> (b) H (c) 2H (d) CO<sub>2</sub> (e) CO<sub>2</sub>+H (f) Carboxyl (g) HCOO (h) HCOO+H and (i) HCOOH adsorbed species.

**SF2:** Lowest energy structure of Pd<sub>12</sub>Cu clusters along with their a) H<sub>2</sub> (b) H (c) 2H (d) CO<sub>2</sub> (e) CO<sub>2</sub>+H (f) Carboxyl (g) HCOO (h) HCOO+H and (i) HCOOH adsorbed species.

**SF3:** The potential energy profile for the formation of (a) bidentate formate by the reaction of H-atom and CO<sub>2</sub> (b) formic acid by the reaction of H-atom and formate on Pd<sub>4</sub>Cu<sub>4</sub> cluster.

**SF4:** The potential energy profile for the formation of (a) bidentate formate by the reaction of H-atom and CO<sub>2</sub> (b) formic acid by the reaction of H-atom and formate on Pd<sub>12</sub>Cu cluster.

**SF5(a):** Total density of states of Pd<sub>2</sub>Cu<sub>2</sub> cluster along with Pd and Cu in that cluster.

**SF5(b):** The orbital projected density of states of Pd<sub>2</sub>Cu<sub>2</sub> cluster.

**SF6(a):** Total density of states of Pd<sub>2</sub>Cu<sub>2</sub>\_CO<sub>2</sub> cluster along with its constituent elements.

**SF6(b):** The orbital projected density of states of Pd<sub>2</sub>Cu<sub>2</sub>\_CO<sub>2</sub> cluster.
